# Supplementary material for: Integrated hybrid modeling and SHAP (SHapley Additive exPlanations) to predict and explain the adsorption properties of thermoplastic polyurethane (TPU) porous materials
Source: Royal Society of Chemistry journal article supplement (doi:10.1039/d4ra00010b), 2024-01-01
Supplement: d4ra00010b1.pdf [file d4ra00010b1.pdf]

## Support Information

### *Integrated hybrid modeling and SHAP (SHapley Additive exPlanations) to predict and explain the adsorption properties of thermoplastic polyurethane (TPU) porous materials.*

Kangyong Ma<sup>1\*</sup>

1. Department of Chemistry and Chemical Engineering, College of Ecology, Lishui University, Lishui, 323000, China.

E-mail address: [kangyongma@outlook.com](mailto:kangyongma@outlook.com)(K.y.Ma)

ORCID: 0000-0001-6948-2560

### 1. Experimental

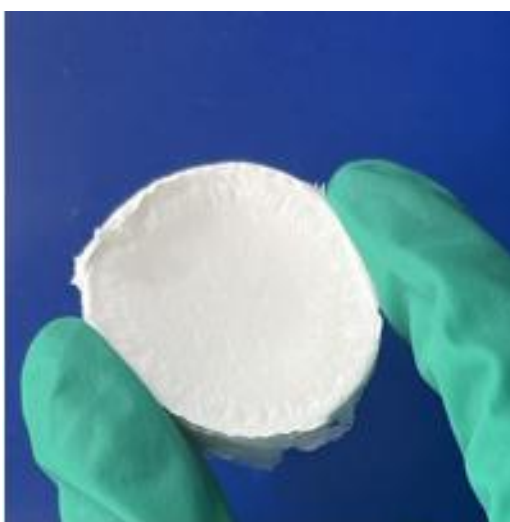

**Fig.1.TPU porous material**

As shown in the Figure.1, we prepared the TPU porous material we tested its adsorption properties to obtain raw data for machine learning.

Table1. TPU Physical Parameters

|       | Soft segment                    | Hard segment                                       | Density (g/ cm3) | Hardness (Shore A) |
|-------|---------------------------------|----------------------------------------------------|------------------|--------------------|
| 1185A | Polytetramethylene ether glycol | 4,4' -diphenylmethane diisocyanate +1,4-butanediol | 1.12             | 85                 |



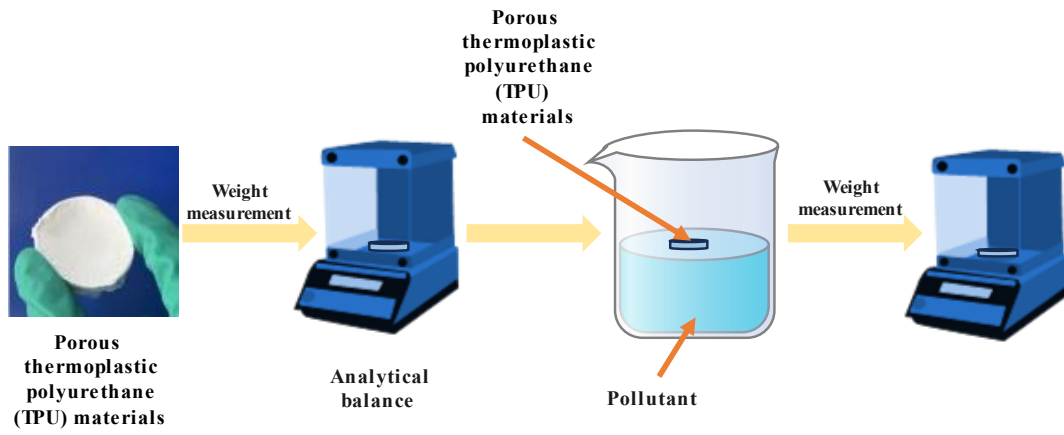

**Fig.3. Adsorption capacity test procedure**

## 2. Machine Learning

### 2.1 Machine learning data part

Table.3. Machine learning data

| adsorption | Concentration (g/ml) | temperature (°C) | time (min) | mixture ratio | acetone | olive | peanut | Cyclohexane | toluene | Sweet almonds | Anhydrous alcohol | coconut oil |
|------------|----------------------|------------------|------------|---------------|---------|-------|--------|-------------|---------|---------------|-------------------|-------------|
| 14.39      | 0.04                 | 0                | 15         | 9.00          | 1       | 0     | 0      | 0           | 0       | 0             | 0                 | 0           |
| 5.79       | 0.04                 | 0                | 15         | 9.00          | 0       | 1     | 0      | 0           | 0       | 0             | 0                 | 0           |
| 5.17       | 0.04                 | 0                | 15         | 9.00          | 0       | 0     | 1      | 0           | 0       | 0             | 0                 | 0           |
| 4.348      | 0.04                 | 0                | 15         | 9.00          | 0       | 0     | 0      | 1           | 0       | 0             | 0                 | 0           |
| 5.91       | 0.04                 | 0                | 15         | 9.00          | 0       | 0     | 0      | 0           | 1       | 0             | 0                 | 0           |
| 6.16       | 0.04                 | 0                | 15         | 9.00          | 0       | 0     | 0      | 0           | 0       | 1             | 0                 | 0           |
| 5.65       | 0.04                 | 0                | 15         | 9.00          | 0       | 0     | 0      | 0           | 0       | 0             | 1                 | 0           |
| 6.21       | 0.04                 | 0                | 15         | 9.00          | 0       | 0     | 0      | 0           | 0       | 0             | 0                 | 1           |
| 10.41      | 0.04                 | 0                | 30         | 5.67          | 1       | 0     | 0      | 0           | 0       | 0             | 0                 | 0           |
| 3.55       | 0.04                 | 0                | 30         | 5.67          | 0       | 1     | 0      | 0           | 0       | 0             | 0                 | 0           |
| 2.41       | 0.04                 | 0                | 30         | 5.67          | 0       | 0     | 1      | 0           | 0       | 0             | 0                 | 0           |
| 2.59       | 0.04                 | 0                | 30         | 5.67          | 0       | 0     | 0      | 1           | 0       | 0             | 0                 | 0           |
| 5.46       | 0.04                 | 0                | 30         | 5.67          | 0       | 0     | 0      | 0           | 1       | 0             | 0                 | 0           |
| 5.41       | 0.04                 | 0                | 30         | 5.67          | 0       | 0     | 0      | 0           | 0       | 1             | 0                 | 0           |
| 4.60       | 0.04                 | 0                | 30         | 5.67          | 0       | 0     | 0      | 0           | 0       | 0             | 1                 | 0           |
| 4.030      | 0.04                 | 0                | 30         | 5.67          | 0       | 0     | 0      | 0           | 0       | 0             | 0                 | 1           |
| 11.33      | 0.04                 | 0                | 30         | 19.00         | 1       | 0     | 0      | 0           | 0       | 0             | 0                 | 0           |
| 3.85       | 0.04                 | 0                | 30         | 19.00         | 0       | 1     | 0      | 0           | 0       | 0             | 0                 | 0           |
| 3.47       | 0.04                 | 0                | 30         | 19.00         | 0       | 0     | 1      | 0           | 0       | 0             | 0                 | 0           |
| 2.68       | 0.04                 | 0                | 30         | 19.00         | 0       | 0     | 0      | 1           | 0       | 0             | 0                 | 0           |
| 9.34       | 0.04                 | 0                | 30         | 19.00         | 0       | 0     | 0      | 0           | 1       | 0             | 0                 | 0           |
| 3.31       | 0.04                 | 0                | 30         | 19.00         | 0       | 0     | 0      | 0           | 0       | 1             | 0                 | 0           |
| 2.028      | 0.04                 | 0                | 30         | 19.00         | 0       | 0     | 0      | 0           | 0       | 0             | 1                 | 0           |
| 4.98       | 0.04                 | 0                | 30         | 19.00         | 0       | 0     | 0      | 0           | 0       | 0             | 0                 | 1           |
| 13.40      | 0.04                 | 0                | 30         | 9.00          | 1       | 0     | 0      | 0           | 0       | 0             | 0                 | 0           |
| 6.36       | 0.04                 | 0                | 30         | 9.00          | 0       | 1     | 0      | 0           | 0       | 0             | 0                 | 0           |
| 6.62       | 0.04                 | 0                | 30         | 9.00          | 0       | 0     | 1      | 0           | 0       | 0             | 0                 | 0           |
| 6.16       | 0.04                 | 0                | 30         | 9.00          | 0       | 0     | 0      | 0           | 0       | 1             | 0                 | 0           |
| 8.36       | 0.04                 | 0                | 30         | 9.00          | 0       | 0     | 0      | 0           | 0       | 0             | 1                 | 0           |
| 5.23       | 0.04                 | 0                | 30         | 9.00          | 0       | 0     | 0      | 0           | 0       | 0             | 0                 | 1           |
| 9.49       | 0.06                 | 0                | 15         | 9.00          | 1       | 0     | 0      | 0           | 0       | 0             | 0                 | 0           |
| 4.21       | 0.06                 | 0                | 15         | 9.00          | 0       | 1     | 0      | 0           | 0       | 0             | 0                 | 0           |
| 3.79       | 0.06                 | 0                | 15         | 9.00          | 0       | 0     | 1      | 0           | 0       | 0             | 0                 | 0           |
| 4.86       | 0.06                 | 0                | 15         | 9.00          | 0       | 0     | 0      | 0           | 0       | 1             | 0                 | 0           |
| 4.19       | 0.06                 | 0                | 15         | 9.00          | 0       | 0     | 0      | 0           | 0       | 0             | 1                 | 0           |
| 3.77       | 0.06                 | 0                | 15         | 9.00          | 0       | 0     | 0      | 0           | 0       | 0             | 0                 | 1           |
| 8.69       | 0.06                 | 0                | 30         | 9.00          | 1       | 0     | 0      | 0           | 0       | 0             | 0                 | 0           |
| 2.079      | 0.06                 | 0                | 30         | 9.00          | 0       | 1     | 0      | 0           | 0       | 0             | 0                 | 0           |
| 2.12       | 0.06                 | 0                | 30         | 9.00          | 0       | 0     | 1      | 0           | 0       | 0             | 0                 | 0           |
| 2.37       | 0.06                 | 0                | 30         | 9.00          | 0       | 0     | 0      | 1           | 0       | 0             | 0                 | 0           |
| 5.86       | 0.06                 | 0                | 30         | 9.00          | 0       | 0     | 0      | 0           | 1       | 0             | 0                 | 0           |
| 2.56       | 0.06                 | 0                | 30         | 9.00          | 0       | 0     | 0      | 0           | 0       | 1             | 0                 | 0           |
| 3.77       | 0.06                 | 0                | 30         | 9.00          | 0       | 0     | 0      | 0           | 0       | 0             | 1                 | 0           |
| 3.62       | 0.06                 | 0                | 30         | 9.00          | 0       | 0     | 0      | 0           | 0       | 0             | 0                 | 1           |
| 7.10       | 0.08                 | 0                | 15         | 9.00          | 1       | 0     | 0      | 0           | 0       | 0             | 0                 | 0           |
| 2.53       | 0.08                 | 0                | 15         | 9.00          | 0       | 1     | 0      | 0           | 0       | 0             | 0                 | 0           |
| 1.51       | 0.08                 | 0                | 15         | 9.00          | 0       | 0     | 1      | 0           | 0       | 0             | 0                 | 0           |
| 1.92       | 0.08                 | 0                | 15         | 9.00          | 0       | 0     | 0      | 1           | 0       | 0             | 0                 | 0           |
| 5.27       | 0.08                 | 0                | 15         | 9.00          | 0       | 0     | 0      | 0           | 1       | 0             | 0                 | 0           |
| 2.11       | 0.08                 | 0                | 15         | 9.00          | 0       | 0     | 0      | 0           | 0       | 1             | 0                 | 0           |
| 2.090      | 0.08                 | 0                | 15         | 9.00          | 0       | 0     | 0      | 0           | 0       | 0             | 1                 | 0           |
| 2.83       | 0.08                 | 0                | 15         | 9.00          | 0       | 0     | 0      | 0           | 0       | 0             | 0                 | 1           |
| 6.98       | 0.08                 | 0                | 30         | 19.00         | 1       | 0     | 0      | 0           | 0       | 0             | 0                 | 0           |
| 4.041      | 0.08                 | 0                | 30         | 19.00         | 0       | 1     | 0      | 0           | 0       | 0             | 0                 | 0           |
| 2.41       | 0.08                 | 0                | 30         | 19.00         | 0       | 0     | 1      | 0           | 0       | 0             | 0                 | 0           |
| 2.22       | 0.08                 | 0                | 30         | 19.00         | 0       | 0     | 0      | 1           | 0       | 0             | 0                 | 0           |
| 6.45       | 0.08                 | 0                | 30         | 19.00         | 0       | 0     | 0      | 0           | 1       | 0             | 0                 | 0           |
| 3.75       | 0.08                 | 0                | 30         | 19.00         | 0       | 0     | 0      | 0           | 0       | 1             | 0                 | 0           |
| 4.073      | 0.08                 | 0                | 30         | 19.00         | 0       | 0     | 0      | 0           | 0       | 0             | 1                 | 0           |
| 3.99       | 0.08                 | 0                | 30         | 19.00         | 0       | 0     | 0      | 0           | 0       | 0             | 0                 | 1           |
| 6.094      | 0.08                 | 0                | 30         | 9.00          | 1       | 0     | 0      | 0           | 0       | 0             | 0                 | 0           |
| 3.13       | 0.10                 | 4                | 30         | 9.00          | 0       | 0     | 1      | 0           | 0       | 0             | 0                 | 0           |
| 1.35       | 0.08                 | 0                | 30         | 9.00          | 0       | 1     | 0      | 0           | 0       | 0             | 0                 | 0           |
| 1.062      | 0.08                 | 0                | 30         | 9.00          | 0       | 0     | 1      | 0           | 0       | 0             | 0                 | 0           |
| 1.46       | 0.08                 | 0                | 30         | 9.00          | 0       | 0     | 0      | 1           | 0       | 0             | 0                 | 0           |
| 1.10       | 0.10                 | 4                | 30         | 9.00          | 0       | 0     | 0      | 0           | 0       | 0             | 0                 | 1           |
| 5.75       | 0.08                 | 0                | 30         | 9.00          | 0       | 0     | 0      | 0           | 1       | 0             | 0                 | 0           |
| 2.72       | 0.08                 | 0                | 30         | 9.00          | 0       | 0     | 0      | 0           | 0       | 1             | 0                 | 0           |
| 2.54       | 0.08                 | 0                | 30         | 9.00          | 0       | 0     | 0      | 0           | 0       | 0             | 1                 | 0           |
| 2.76       | 0.08                 | 0                | 30         | 9.00          | 0       | 0     | 0      | 0           | 0       | 0             | 0                 | 1           |
| 4.91       | 0.10                 | 0                | 30         | 9.00          | 1       | 0     | 0      | 0           | 0       | 0             | 0                 | 0           |
| 3.22       | 0.10                 | 0                | 30         | 9.00          | 0       | 1     | 0      | 0           | 0       | 0             | 0                 | 0           |
| 3.36       | 0.10                 | 0                | 30         | 9.00          | 0       | 0     | 1      | 0           | 0       | 0             | 0                 | 0           |
| 1.46       | 0.10                 | 0                | 30         | 9.00          | 0       | 0     | 0      | 1           | 0       | 0             | 0                 | 0           |
| 5.13       | 0.10                 | 0                | 30         | 9.00          | 0       | 0     | 0      | 0           | 1       | 0             | 0                 | 0           |
| 3.54       | 0.10                 | 0                | 30         | 9.00          | 0       | 0     | 0      | 0           | 0       | 1             | 0                 | 0           |
| 3.35       | 0.10                 | 0                | 30         | 9.00          | 0       | 0     | 0      | 0           | 0       | 0             | 1                 | 0           |
| 4.057      | 0.10                 | 4                | 30         | 9.00          | 1       | 0     | 0      | 0           | 0       | 0             | 0                 | 0           |
| 3.23       | 0.10                 | 4                | 30         | 9.00          | 0       | 1     | 0      | 0           | 0       | 0             | 0                 | 0           |
| 1.63       | 0.10                 | 4                | 30         | 9.00          | 0       | 0     | 0      | 1           | 0       | 0             | 0                 | 0           |
| 5.25       | 0.04                 | 0                | 30         | 9.00          | 0       | 0     | 0      | 1           | 0       | 0             | 0                 | 0           |
| 10.32      | 0.04                 | 0                | 30         | 9.00          | 0       | 0     | 0      | 0           | 1       | 0             | 0                 | 0           |
| 2.47       | 0.10                 | 4                | 30         | 9.00          | 0       | 0     | 0      | 0           | 1       | 0             | 0                 | 0           |
| 3.20       | 0.06                 | 0                | 15         | 9.00          | 0       | 0     | 0      | 1           | 0       | 0             | 0                 | 0           |
| 7.61       | 0.06                 | 0                | 15         | 9.00          | 0       | 0     | 0      | 0           | 1       | 0             | 0                 | 0           |
| 1.81       | 0.10                 | 0                | 30         | 9.00          | 0       | 0     | 0      | 0           | 0       | 0             | 0                 | 1           |
| 5.75       | 0.08                 | 0                | 30         | 9.00          | 0       | 0     | 0      | 0           | 1       | 0             | 0                 | 0           |
| 2.72       | 0.08                 | 0                | 30         | 9.00          | 0       | 0     | 0      | 0           | 0       | 1             | 0                 | 0           |

The mixture ratio in Table 3 of the Machine Learning data refers to the proportion

of 1,4-dioxane to deionized water. For the definition of adsorption please see the text section. Detailed information on adsorption data for TPU porous materials can be found at <https://osf.io/jnu9d/>

## 2.2. Models Development

### 2.2.1. XGBoost Developmet

#### XGBoost Hyperparameter Tuning

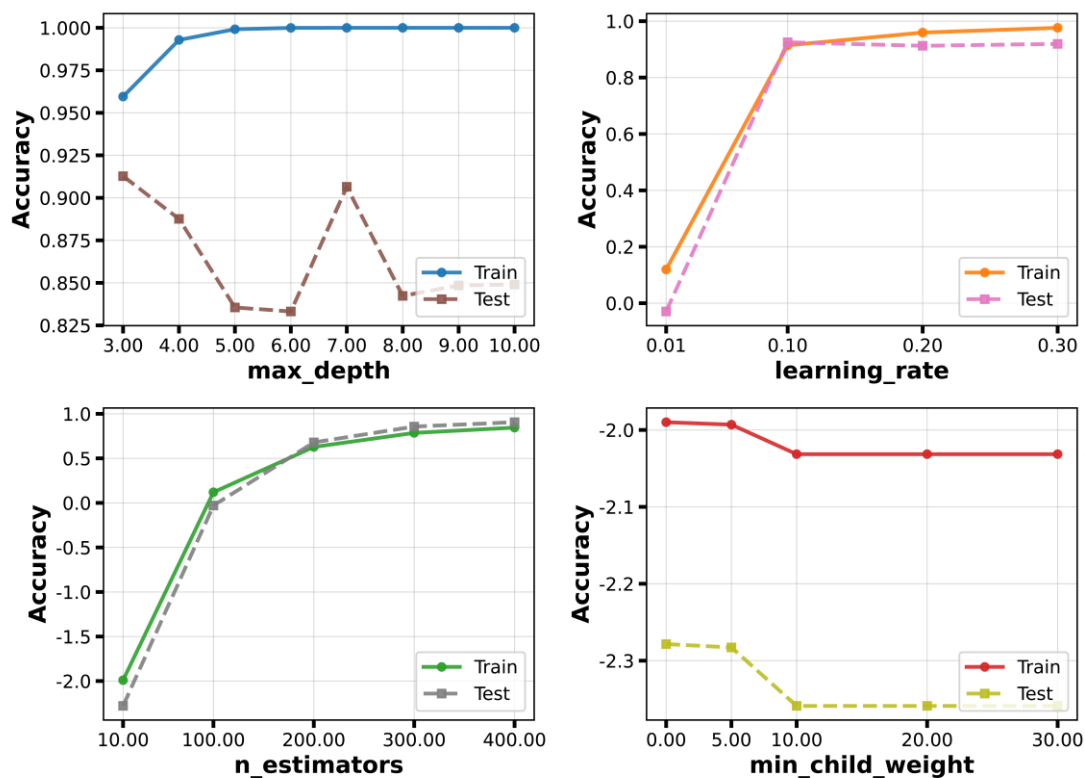

Fig.4. Relationship between XGBoost parameters and accuracy

### 2.2.2. Decision Tree Regressor Developmet

**DecisionTreeRegressor Hyperparameters Effect Diagram**

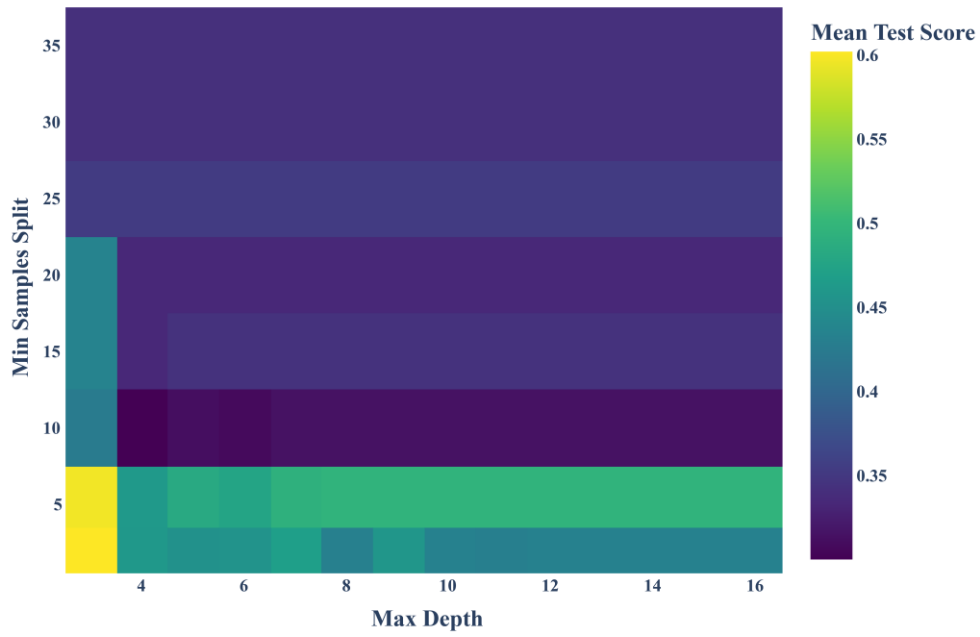

**DecisionTreeRegressor Hyperparameters Effect Diagram**

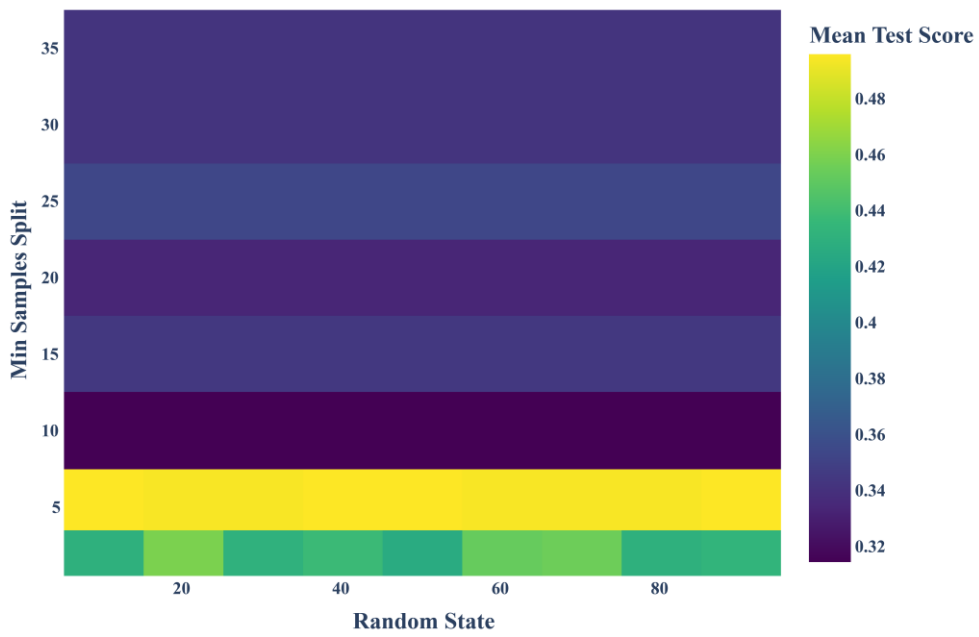

**Fig.5.Relationship between DTR parameters and accuracy**

### 2.2.3. KNeighbors Regressor Development

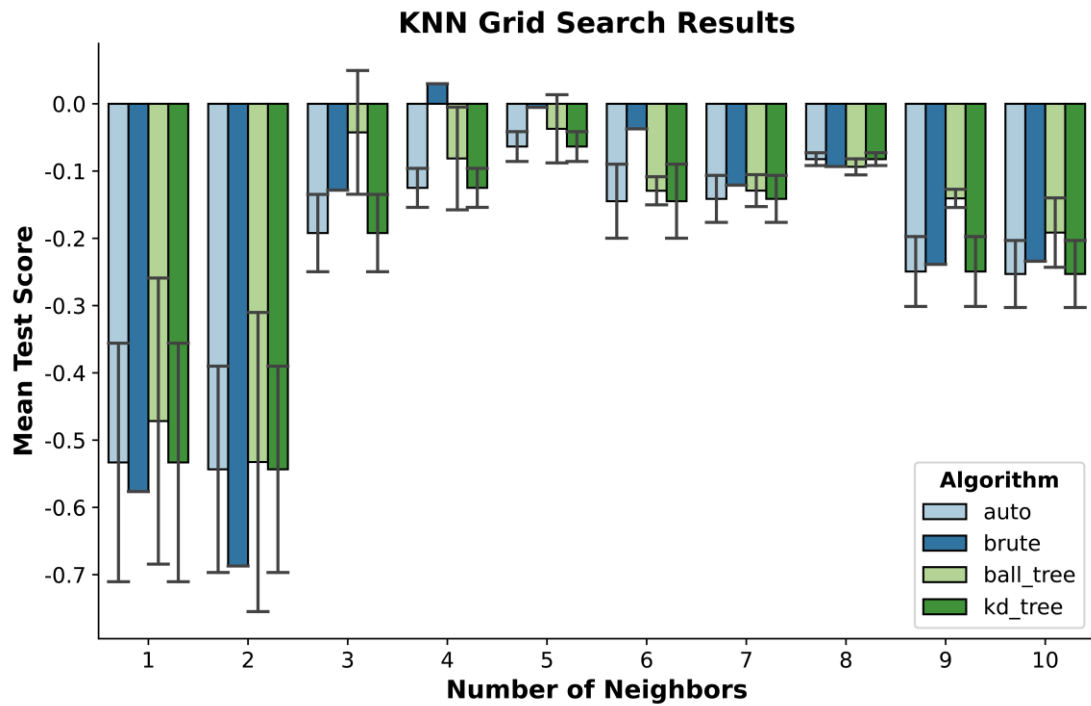

Fig.6. Relationship between KNN parameters and accuracy

### 2.2.4. Bagging Regression Development

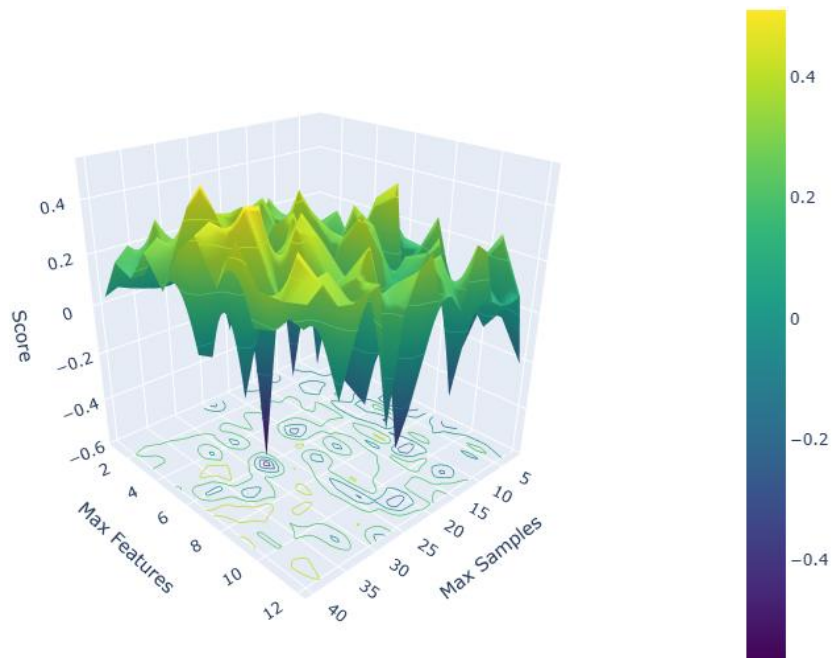

Fig.7. Relationship between BGR parameters and accuracy

## 2.2.5. Extra Trees Regression Development

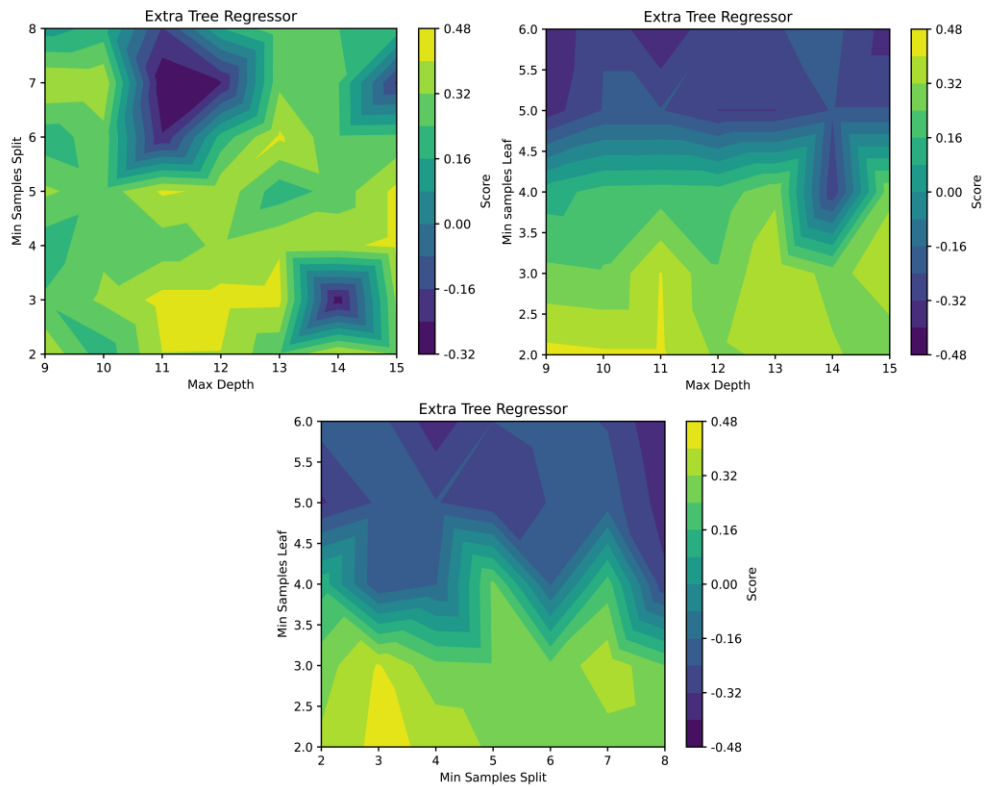

Fig.8. Relationship between ETR parameters and accuracy

## 2.2.6. Ensemble Hybrid Model Development



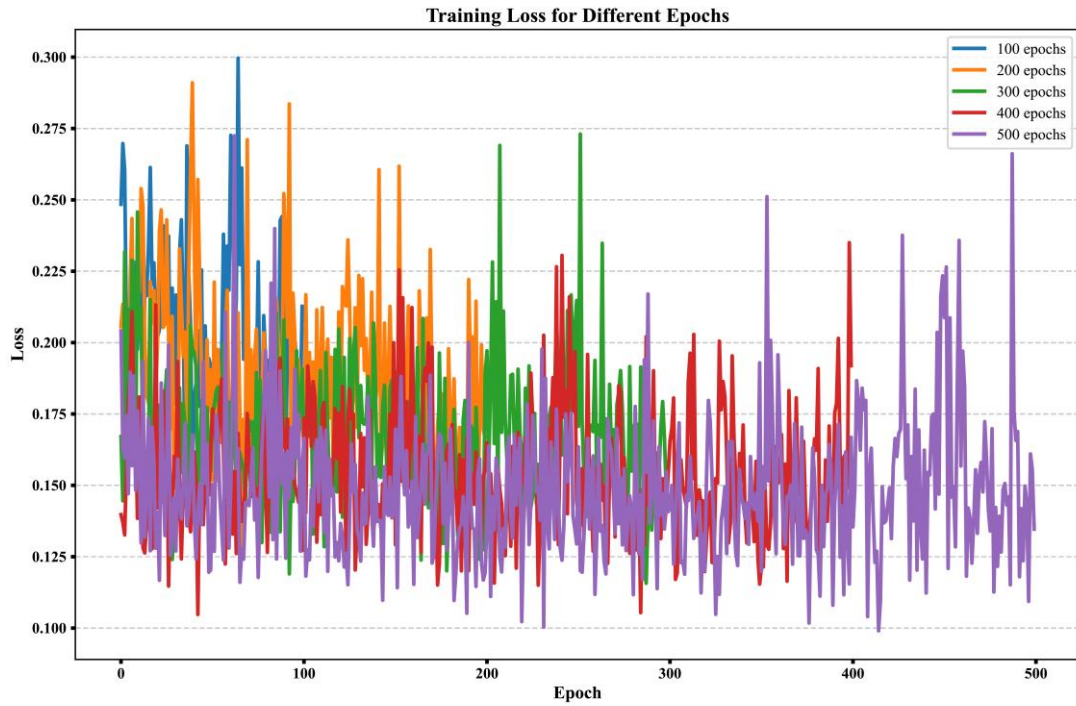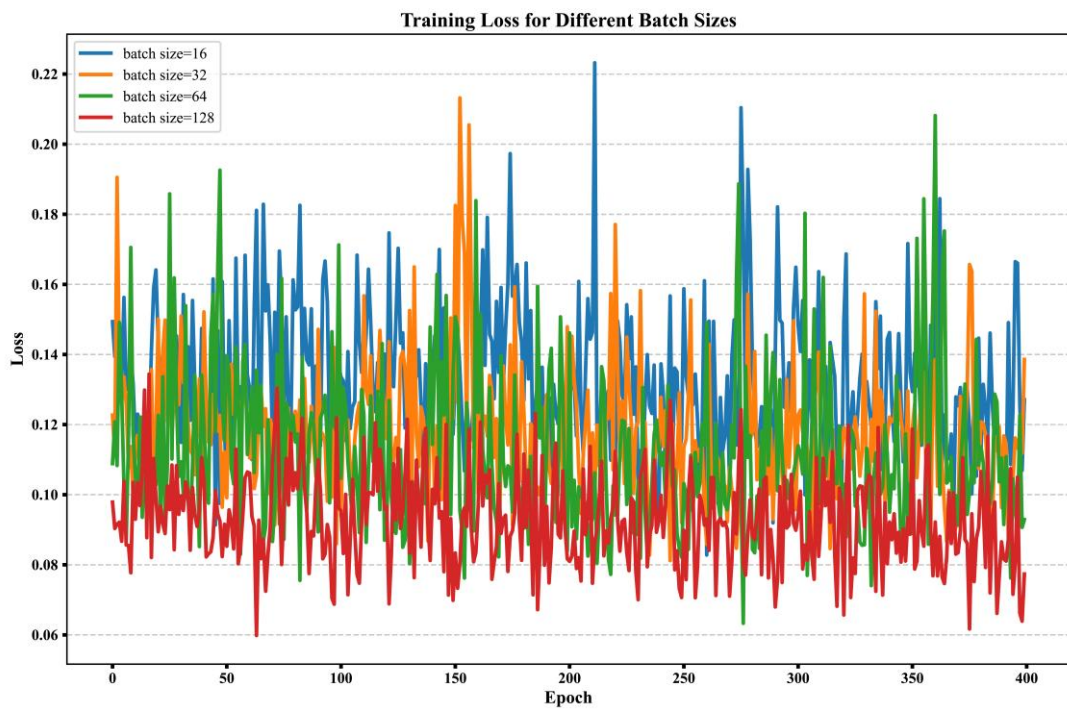

**Fig.9. Training Loss for Different Batch sizes and Epoch**

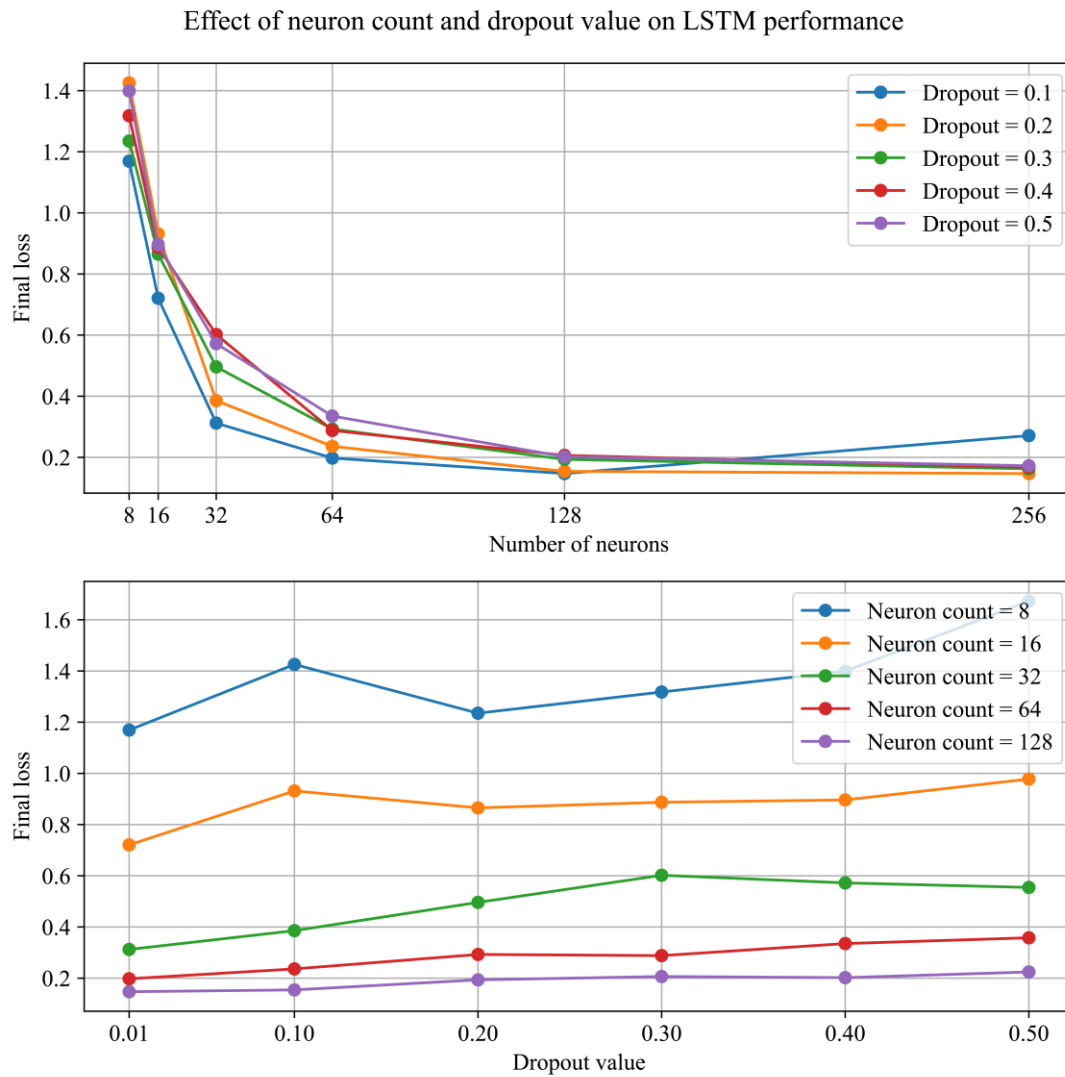

**Fig.10. Effect of neuron count and dropout value on LSTM performance**

## References

[1] Wang Y, Zou G, Shang L. Effects of temperature and hard segment content on the interfacial mechanical properties of graphene/thermoplastic polyurethane composites: a molecular dynamics study[J]. Computational Materials Science, 2022, 213: 111635.
